# Supplementary material for: Evaluation of Antimicrobial Activity in the Extract of Defatted Hermetia illucens Fed Organic Waste Feed Containing Fermented Effective Microorganisms
Source: MDPI journal article supplement (doi:10.3390/ani12060680), 2022-03-08
Supplement: s1 [file s1]

# Supplementary information

**Table S1.** Comparison of nutritional composition in HIL and crushed HIL powder.

| Composition        | Moisture (%) | Crude carbohydrate (%) | Crude protein (%) | Crude fat (%) | Crude ash (%) |
|--------------------|--------------|------------------------|-------------------|---------------|---------------|
| HIL                | 0.57 ± 0.15  | 2.84 ± 0.87            | 8.63 ± 0.98       | 86.66 ± 1.57  | 1.30 ± 1.62   |
| Crushed HIL powder | 1.19 ± 0.24  | 20.90 ± 4.66           | 64.00 ± 4.62      | 7.17 ± 0.73   | 10.67 ± 4.60  |
